# Supplementary material for: Interactions of 172 plant extracts with human organic anion transporter 1 (SLC22A6) and 3 (SLC22A8): a study on herb-drug interactions
Source: PeerJ. 2017 May 25;5:e3333. doi: 10.7717/peerj.3333 (PMC5446775; doi:10.7717/peerj.3333)
Supplement: Supplemental Information 3 [file peerj-05-3333-s003.xlsx]

## Sheet: OAT1
Artocarpus altilis (B)					Echium russicum(B)					Scutellaria orientalis (A)					Thymus kotschyanus (B)
ug/ml					ug/ml					ug/ml					ug/ml
0	99	107	103		0	107	100	98		0	98	104	99		0	100	105	97
0.0205761	115	100	110		0.0205761	78	90	102		0.0617284	75	108	104		0.0205761	104	105	97
0.0617284	110	97	110		0.0617284	95	109	104		0.185185	108		100		0.0617284	108	111	103
0.185185	104	102	98		0.185185	92	107	103		0.555556	100	106			0.185185	95	99	86
0.555556	104	102	98		0.555556	92	96	96		1.66667	94	99	90		0.555556	99	96	94
1.66667	93	82	86		1.66667	104	104	107		5	92	94	90		1.66667	85	102	99
5	79	81	78		5	73	76	72							5	77	69	76
Achillea biebersteinii (H)					Glycyrrhiza glabra (D)					Scutellaria orientalis (B)					Zygophyllum fabago (D)
ug/ml					ug/ml					ug/ml					ug/ml
0	101	98	101		0	103	99	98		0	100	107	94		0	97	96	108
0.0617284	94	95	89		0.0617284	99	90	77		0.0617284	84	80	94		0.0617284	86	108	102
0.185185	92	98	109		0.185185	84	100	88		0.185185	83	96	97		0.185185	99	104	112
0.555556	95	93	105		0.555556	66	91	81		0.555556	83	93	92		0.555556	82	103	104
1.66667	83	85	88		1.66667	69	84	83		1.66667	71	78	77		1.66667	89	89	101
5	71	83	103		5	60	58	72		5	95	83	105		5	78	91	96
Atraphaxis spinosa (D)					Juniperus oblonga (LF+FR) (B)					Stachys lavandulifolia (A)
ug/ml					ug/ml					ug/ml
0	103	99	98		0	98	98	104		0	89	103	108
0.0617284	107	96	109		0.0617284	105	108	92		0.0617284	75	72	93
0.185185	114	114	90		0.185185	105	117	108		0.185185	101	97	90
0.555556	92	96	105		0.555556	105	113			0.555556	86	86	90
1.66667	86	79	83		1.66667	106	114	106		1.66667	86	99	92
5	73	79	78		5	81	76	77		5	84	85	84
					Primula	macrocalyx (D)				Stachys lavandulifolia (D)
					ug/ml					ug/ml
					0	100	107	94		0	104	97	99
					0.0205761	78	86	82		0.0617284	99	101	89
					0.0617284	83	89	87		0.185185	94	95	91
					0.185185	76	90	89		0.555556	93	88	96
					0.555556	73	83	82		1.66667	69	78	86
					1.66667	63	64	68		5	52	67	65
					5	49	52	46
										Symphytum asperum (A)
										ug/ml
										0	103	99	98
										0.0617284	103	104	69
										0.185185	114	106	98
										0.555556	86	90	93
										1.66667	82	94	85
										5	77	94	85
										Symphytum asperum (D)
										ug/ml
										0	99	107	98
										0.0205761	76	97	99
										0.0617284	107	98	102
										0.185185	84	103	110
										0.555556	108	93	109
										1.66667	95	96	101
										5	116	137	140

## Sheet: OAT3
Anchusa azurea (D)					Scrophularia orientalis (D)
ug/ml					ug/ml
0	95	108	103		0	100	103	95
0.0205761	100	107	108		0.0205761	80	87	82
0.0617284	104	116	111		0.0617284	86	83	102
0.185185	98	106	110		0.185185	75	79	79
0.555556	90	96	104		0.555556	70	81	94
1.66667	80	89	90		1.66667	72	76	78
5	53	53	58		5	82	71	79
Camphorosma lessingii (D)					Scutellaria orientalis (D)
ug/ml					ug/ml
0	97	103	100		0	100	105	92
0.0205761	68	72	61		0.0205761	94	88	81
0.0617284	84	63	65		0.0617284	97	93	84
0.185185	84	77	69		0.185185	84	84	84
0.555556	74	76	73		0.555556	83	87	83
1.66667	55	62	68		1.66667	63	81	69
5	44	45	46		5	67	65	64
Caltha polypetala (D)					Scutellaria orientalis (B)
ug/ml					ug/ml
0	92	108	111		0	107	105	52
0.0617284	82	78	94		0.0617284	100	103	89
0.185185	92	78	83		0.185185	85	101	92
0.555556	89	84	91		0.555556	92	70	70
1.66667	80	75	66		1.66667	55	76	69
5	56	51	67		5	53	65	48
Juniperus oblonga (RT) (H)					Solanum dulcamara (ST+RT) (D)
ug/ml					ug/ml
0	97	105	96		0	90	102	108
0.0205761	99	92	95		0.0617284	93	74	88
0.0617284	98	99	98		0.185185	93	85	106
0.185185	59	57	64		0.555556	56	84	84
0.555556	84	92	95		1.66667	56	76	64
1.66667	93	93	94		5	43	66	69
5	61	57	62
Juniperus oblonga (RT) (D)					Stachys lavandulifolia (D)
ug/ml					ug/ml
0	100	103	94		0	114	95	91
0.0205761	95	99	114		0.0617284	111	89	111
0.0617284	104	113	113		0.185185	100	78	93
0.185185	101	114	107		0.555556	106	95	113
0.555556	97	111	108		1.66667	92	97	88
1.66667	87	92	93		5	73	78	78
5	85	89	87
					Symphytum asperum (D)
					ug/ml
					0	95	103	92
					0.0205761	90	99	100
					0.0617284	100	106	105
					0.185185	107	107	107
					0.555556	90	105	101
					1.66667	95	101	95
					5	73	75	73
