# Supplementary material for: Interactions of 172 plant extracts with human organic anion transporter 1 (SLC22A6) and 3 (SLC22A8): a study on herb-drug interactions
Source: PeerJ. 2017 May 25;5:e3333. doi: 10.7717/peerj.3333 (PMC5446775; doi:10.7717/peerj.3333)
Supplement: Supplemental Information 4 — For the initial screening, those plant extracts showing more than 50% inhibition on OAT-mediated uptake were further repeated for the uptake experiment. [file peerj-05-3333-s004.xlsx]

## Sheet: OAT1
	Second Plate			First plate
Control	104.052	96.0668	91.4357	103.312	105.612	91.076
Achillea biebersteinii (H)	52.0365	55.409	55.1992	48.6285	56.4888	44.5926
Symphytum asperum (H)	48.9868	49.8931	50.7497	37.7968	32.7139	60.7306
Atraphaxis spinosa (D)	42.6883	39.9129	40.6497	38.5645	49.9858	49.9301
Camphorosma lessingii (D)	31.8609	30.968	32.509	35.0024	36.879	39.8529
Glycyrrhiza glabra (D)	41.7134	42.9061	42.2123	33.1391	45.6351	33.8466
Polygonum hydropiper (D)	26.924	26.6888	27.8994	43.2355	39.0548	38.8115
Primula macrocalyx (D)	19.7958	19.197	19.588	30.1499	27.1868	25.5629
Stachys lavandulifolia (A)	44.8988	42.857	43.9883	19.7312	66.8484	65.4002
Symphytum asperum (D)	47.1267	46.0777	39.5195	43.3383	65.5618	23.3482
Zygophyllum fabago (D)	43.1038	43.1629	48.4658	27.598	56.226	53.4203
Artocarpus altilis (B)	46.0791	46.3966	46.9594	46.8755	50.4655	50.7862
Echium russicum (B)	32.3189	33.069	34.4322	49.4327	47.1776	49.1091
Geranium tuberosum (B)	9.70734	10.8521	10.2925	26.2469	31.7532	31.215
Juniperus oblonga(LF+FR) (B)	31.8478	32.4691	28.7234	43.1562	28.0665	63.4277
Scutellaria orientalis (B)	44.2268	47.5965	43.0911	18.1494	59.9557	65.4475
Thymus kotschyanus (B)	36.3292	37.2107	37.6138	37.3497	42.443	31.4081
Scutellaria orientalis (A)	53.3294	56.9699	60.5938	74.3915	29.8937	29.7403
Stachys lavandulifolia (A)	51.2385	55.4204	52.1305	62.186	32.3629	12.7349

## Sheet: OAT3
		Second Plate			First Plate
	Control	112.013	93.4112	118.635	109.522	84.8664	105.611
	Chaerophyllum bulbosum (H)	23.4828	28.0262	36.2418	43.4761	36.8407	45.0696
	Juniperus oblonga(RT) (H)	45.8501	40.7239	38.4714	52.2933	58.3647	45.4129
	Anchusa azurea (D)	74.9661	46.0772	75.3146	49.6052	47.2238	48.7969
	Astracantha microcephala (D)	34.8021	26.0037	42.4721	26.3361	52.6906	59.1931
	Caltha polypetala (D)	44.5317	54.8241	43.6633	43.0213	36.6529	57.4934
	Camphorosma lessingii (D)	28.0319	30.7943	26.9664	32.8874	56.1978	44.8371
	Glycyrrhiza glabra (D)	42.7406	42.6292	40.6324	22.1009	37.3404	20.9449
	Polygonum hydropiper (D)	53.5529	59.8889	55.8325	41.0585	31.4566	38.7197
	Primula macrocalyx (D)	32.4625	30.8028	29.2203	32.9353	34.4383	42.4312
	Stachys lavandulifolia (D)	37.3959	36.0776	37.6673	55.7671	31.6555	30.6653
	Symphytum asperum (D)	43.3577	40.5568	44.1975	37.7252	36.1967	31.0284
	Juncus effusus (D)	32.6168	33.8366	36.8046	20.36	19.3995	24.4611
	Juniperus oblonga(RT) (D)	65.8392	37.016	64.5023	49.3269	31.5554	30.5114
	Juniperus oblonga(LF+FR) (D)	47.037	39.9526	38.9071	35.7656	29.8259	45.2868
	Scrophularia orientalis (D)	26.278	38.0901	38.43	19.7779	48.5948	49.2031
	Scutellaria orientalis (D)	34.7421	56.1382	42.1236	50.8788	48.1795	49.189
	Solanum dulcamara(ST+RT) (D)	36.8032	42.0622	48.7095	49.5199	46.709	46.1631
	Anchusa azurea (B)	25.7095	25.1268	25.6252	17.2919	19.0048	8.56537
	Mentha longifolia (B)	34.7436	39.8218	37.021	56.1365	37.6329	57.3718
	Symphytum asperum (B)	24.2604	29.4225	24.0131	20.6745	26.7404	30.0177
	Echium russicum (B)	24.2257	30.157	23.6184	14.6907	18.3647	18.1749
	Juniperus oblonga(LF+FR) (B)	21.5535	20.1249	20.3939	20.2838	24.4887	32.0747
	Scutellaria orientalis (B)	27.6468	35.5418	43.6594	56.8061	55.7706	37.5606
	Thymus kotschyanus (B)	24.4701	21.7806	24.2141	23.6533	25.13	23.0382
	Anchusa azurea (A)	52.5437	53.197	59.1371	45.1054	53.7394	50.7857
